# Supplementary material for: Limonene Emissions: Do Different Types Have Different Biological Effects?
Source: MDPI journal article supplement (doi:10.3390/ijerph181910505), 2021-10-07
Supplement: s1 [file s1]

## Supplementary Tables

Supplementary Table S1. Main VOCs present in the S- and R-limonene reagents and in the cold-press orange oil.

| <i>Compounds</i>                         | <i>CAS#</i> | <i>R-limonene</i> | <i>S-limonene</i> | <i>Natural<br/>orange oil</i> |
|------------------------------------------|-------------|-------------------|-------------------|-------------------------------|
| Limonene*                                | 138-86-3    | ✓                 | ✓                 | ✓                             |
| Limonene oxide                           | 1195-92-2   | ✓                 | ✓                 |                               |
| Acetone*                                 | 67-64-1     | ✓                 | ✓                 | ✓                             |
| L-dihydrocarvyl acetate                  | 20777-49-5  | ✓                 | ✓                 |                               |
| Acetaldehyde*                            | 75-07-0     | ✓                 | ✓                 |                               |
| beta-trans-Ocimene                       | 3779-61-1   | ✓                 |                   | ✓                             |
| Hydroxyacetone                           | 116-09-6    | ✓                 | ✓                 |                               |
| beta-Myrcene                             | 123-35-3    | ✓                 |                   | ✓                             |
| D-carvone*                               | 2244-16-8   | ✓                 | ✓                 |                               |
| 4-Isopropenyl-1-methyl-2-cyclohexen-1-ol | 7212-40-0   | ✓                 | ✓                 |                               |
| 2-(4-Methylenecyclohexyl)-2-propen-1-ol  | 29548-13-8  | ✓                 | ✓                 |                               |
| Perilla alcohol                          | 536-59-4    | ✓                 | ✓                 |                               |
| Sabinene                                 | 3387-41-5   | ✓                 |                   | ✓                             |
| cis-p-Menth-2,8-dienol                   | 22771-44-4  | ✓                 | ✓                 |                               |
| trans-Carveol                            | 1197-07-5   | ✓                 | ✓                 |                               |
| Methanol*                                | 67-56-1     | ✓                 | ✓                 |                               |
| 3-Methylhexane*                          | 589-34-4    | ✓                 |                   |                               |
| L-carveol, mixture of cis and trans      | 99-48-9     | ✓                 | ✓                 |                               |
| 3-Cyclohexene-1-carboxaldehyde           | 100-50-5    |                   | ✓                 |                               |
| 1-p-Menthene                             | 5502-88-5   |                   | ✓                 |                               |
| (Z)-beta-ocimene                         | 3338-55-4   |                   |                   | ✓                             |
| Octanal                                  | 124-13-0    |                   |                   | ✓                             |
| beta-Phellandrene                        | 555-10-2    |                   |                   | ✓                             |
| alpha-Phellandrene                       | 99-83-2     |                   |                   | ✓                             |
| Ethanol*                                 | 64-17-5     |                   |                   | ✓                             |
| Terpinolene                              | 586-62-9    |                   |                   | ✓                             |

|                     |           |   |
|---------------------|-----------|---|
| Linalool            | 78-70-6   | ✓ |
| Decanal             | 112-31-2  | ✓ |
| alpha-Pinene        | 80-56-8   | ✓ |
| (E)-citral*         | 141-27-5  | ✓ |
| 1-Octanol*          | 111-87-5  | ✓ |
| (R)-(+)-citronellal | 2385-77-5 | ✓ |
| beta-Citral*        | 106-26-3  | ✓ |

\*Classified as hazardous under Safe Work Australia, Hazardous Chemical Information System (SWA 2021)

Supplementary Table S2. Repellency rates of adult mosquitoes in the choice test between R-limonene and natural orange oil.

|                   |                                                                        | <i>Number of mosquitoes on each side</i> |                               |               |
|-------------------|------------------------------------------------------------------------|------------------------------------------|-------------------------------|---------------|
| <i>Replicates</i> | <i>Filter paper position<br/>(R-limonene - Natural<br/>orange oil)</i> | <i>R-limonene</i>                        | <i>Natural<br/>orange oil</i> | <i>Middle</i> |
| 1                 | left-right                                                             | 1                                        | 3                             | 17            |
| 2                 | right-left                                                             | 4                                        | 5                             | 10            |
| 3                 | left-right                                                             | 1                                        | 9                             | 11            |
| 4                 | right-left                                                             | 2                                        | 6                             | 12            |
| 5                 | left-right                                                             | 1                                        | 8                             | 10            |
| 6                 | right-left                                                             | 1                                        | 10                            | 11            |
| 7                 | left-right                                                             | 1                                        | 9                             | 10            |
| 8                 | right-left                                                             | 1                                        | 7                             | 12            |
| <i>Average</i>    |                                                                        | 1.5                                      | 7.1                           | 11.6          |

Supplementary Table S3. Repellency rates of adult mosquitoes in the choice test between R-limonene and ethanol.

|                   |                                                         | <i>Number of mosquitoes on each side</i> |                   |               |
|-------------------|---------------------------------------------------------|------------------------------------------|-------------------|---------------|
| <i>Replicates</i> | <i>Filter paper position<br/>(Ethanol - R-limonene)</i> | <i>Ethanol</i>                           | <i>R-limonene</i> | <i>Middle</i> |
| 1                 | left-right                                              | 7                                        | 1                 | 12            |
| 2                 | right-left                                              | 13                                       | 1                 | 5             |
| 3                 | left-right                                              | 11                                       | 0                 | 9             |
| 4                 | right-left                                              | 14                                       | 1                 | 4             |
| 5                 | left-right                                              | 11                                       | 1                 | 7             |
| 6                 | left-right                                              | 7                                        | 1                 | 10            |
| 7                 | right-left                                              | 10                                       | 0                 | 9             |
| 8                 | left-right                                              | 16                                       | 1                 | 4             |
| <i>Average</i>    |                                                         | 11.1                                     | 0.8               | 8             |

Supplementary Table S4. Repellency rates of adult mosquitoes in the choice test between natural orange oil and ethanol.

|                   |                                                                     | <i>Number of mosquitoes on each side</i> |                |               |
|-------------------|---------------------------------------------------------------------|------------------------------------------|----------------|---------------|
| <i>Replicates</i> | <i>Filter paper position<br/>(Natural orange oil -<br/>Ethanol)</i> | <i>Natural orange<br/>oil</i>            | <i>Ethanol</i> | <i>Middle</i> |
| 1                 | left-right                                                          | 3                                        | 8              | 10            |
| 2                 | right-left                                                          | 2                                        | 8              | 8             |
| 3                 | left-right                                                          | 6                                        | 3              | 10            |
| 4                 | right-left                                                          | 2                                        | 8              | 8             |
| 5                 | left-right                                                          | 1                                        | 7              | 11            |
| 6                 | right-left                                                          | 1                                        | 7              | 12            |
| <i>Average</i>    |                                                                     | 2.5                                      | 6.8            | 9.8           |

Supplementary Table S5. Repellency rates of adult mosquitoes in the choice test between R-limonene and S-limonene.

|                   |                                                                 | <i>Number of mosquitoes on each side</i> |                   |               |
|-------------------|-----------------------------------------------------------------|------------------------------------------|-------------------|---------------|
| <i>Replicates</i> | <i>Filter paper position<br/>(R-limonene - S-<br/>limonene)</i> | <i>R-limonene</i>                        | <i>S-limonene</i> | <i>Middle</i> |
| 1                 | left-right                                                      | 6                                        | 3                 | 13            |
| 2                 | right-left                                                      | 5                                        | 3                 | 12            |
| 3                 | left-right                                                      | 8                                        | 4                 | 9             |
| 4                 | right-left                                                      | 1                                        | 3                 | 16            |
| 5                 | left-right                                                      | 1                                        | 5                 | 14            |
| 6                 | right-left                                                      | 4                                        | 2                 | 14            |
| 7                 | left-right                                                      | 4                                        | 2                 | 13            |
| 8                 | right-left                                                      | 3                                        | 3                 | 13            |
| <i>Average</i>    |                                                                 | 4                                        | 3.1               | 13            |
